# Supplementary material for: MnOxHy-modified CoMoP/NF nanosheet arrays as hydrogen evolution reaction and oxygen evolution reaction bifunctional catalysts under alkaline conditions
Source: Royal Society of Chemistry journal article supplement (doi:10.1039/d3dt02467a), 2023-01-01
Supplement: d3dt02467a1.pdf [file d3dt02467a1.pdf]

## Supporting Information

### **MnO<sub>x</sub>H<sub>y</sub>-modified CoMoP/NF nanosheet arrays as hydrogen evolution reaction and oxygen evolution reaction bifunctional catalysts under alkaline condition**

Xuemin Wang, Ke Zhang, Yuhan Xie, Dehua Yu, Haoze Tian and Yongbing Lou\*

School of Chemistry and Chemical Engineering, Southeast University, Nanjing, 211189, P. R. China. E-mail: lou@seu.edu.cn.

## List of figures and tables

**Figure S1.** (a) SEM of bare NF at 100  $\mu\text{m}$  size; (b) SEM of bare NF at 10  $\mu\text{m}$  size; (c) SEM of bare NF at 1  $\mu\text{m}$  size.

**Figure S2.** (a) SEM of  $\text{MnO}_x\text{H}_y/\text{NF}$  at 100  $\mu\text{m}$  size; (b) SEM of  $\text{MnO}_x\text{H}_y/\text{NF}$  at 10  $\mu\text{m}$  size; (c) SEM of  $\text{MnO}_x\text{H}_y/\text{NF}$  at 1  $\mu\text{m}$  size.

**Figure S3.** (a) SEM of CoMo precursors/NF at 20  $\mu\text{m}$  size; (b) SEM of CoMo precursors/NF at 10  $\mu\text{m}$  size; (c) SEM of CoMo precursors/NF at 1  $\mu\text{m}$  size.

**Figure S4.** SEM-EDS spectra of  $\text{MnO}_x\text{H}_y/\text{CoMoP}/\text{NF}$ .

**Figure S5.** TEM-EDS spectra of  $\text{MnO}_x\text{H}_y/\text{CoMoP}/\text{NF}$ .

**Figure S6.** XRD of CoMoP powder.

**Figure S7.** HER LSV curves of  $\text{MnO}_x\text{H}_y/\text{CoMoP}/\text{NF}$  with different electrodeposition times.

**Figure S8.** CV curves of NF,  $\text{MnO}_x\text{H}_y/\text{NF}$ , CoMoP/NF, and  $\text{MnO}_x\text{H}_y/\text{CoMoP}/\text{NF}$  in the voltage range of -1.0V to -0.9V (V vs Ag/AgCl).

**Figure S9.** OER LSV curves of  $\text{MnO}_x\text{H}_y/\text{CoMoP}/\text{NF}$  with different electrodeposition times.

**Figure S10.** CV curves of NF,  $\text{MnO}_x\text{H}_y/\text{NF}$ , CoMoP/NF, and  $\text{MnO}_x\text{H}_y/\text{CoMoP}/\text{NF}$  in the voltage range of 0-0.1V (V vs Ag/AgCl).

**Figure S11.** (a) Calculated TOFs for the as-synthesized catalysts in 1 M KOH (for HER); (b) TOF values of the as-synthesized catalysts at the overpotential of 100 mV (for HER); (c) Calculated TOFs for the as-synthesized catalysts in 1 M KOH (for OER); (d) TOF values of the as-synthesized catalysts at the overpotential of 300 mV (for OER).

**Figure S12.** (a) Electrocatalytic HER LSV (without IR-correction, Speed of 5  $\text{mV s}^{-1}$ ) performance of  $\text{MnO}_x\text{H}_y/\text{CoMoP}/\text{NF}$ , CoMoP/NF,  $\text{MnO}_x\text{H}_y/\text{NF}$  and bare NF in 1 M KOH; (b) Electrocatalytic OER LSV (without IR-correction, Speed of 5  $\text{mV s}^{-1}$ ) performance of  $\text{MnO}_x\text{H}_y/\text{CoMoP}/\text{NF}$ , CoMoP/NF,  $\text{MnO}_x\text{H}_y/\text{NF}$  and bare NF in 1 M KOH.

**Figure S13.** XPS of  $\text{MnO}_x\text{H}_y/\text{CoMoP}/\text{NF}$  as HER cathode and OER anode after 24 h stability treatment.

**Figure S14.** XRD of  $\text{MnO}_x\text{H}_y/\text{CoMoP}/\text{NF}$  as HER cathode and OER anode after 24 h stability treatment.

**Table S1.** The mass of of the as-synthesized catalysts.

**Table S2.** EIS equivalent circuit fitting results of catalysts under HER condition.

**Table S3.** EIS equivalent circuit fitting results of catalysts under OER condition.

**Table S4.** HER activity comparison of different catalysts in alkaline condition.

**Table S5.** OER activity comparison of different catalysts in alkaline condition.

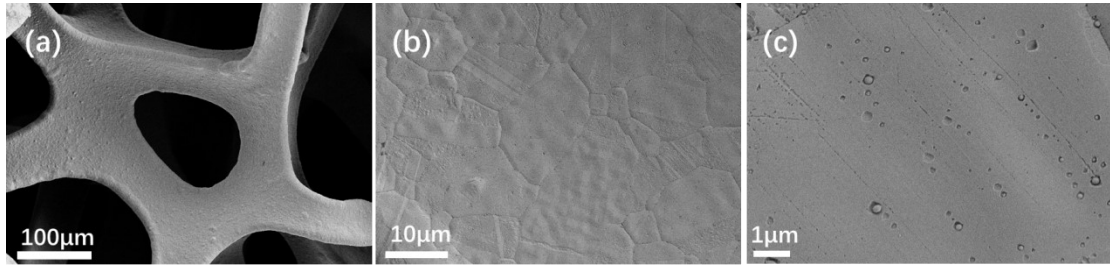

**Figure S1.** (a) SEM of bare NF at 100  $\mu\text{m}$  size; (b) SEM of bare NF at 10  $\mu\text{m}$  size; (c) SEM of bare NF at 1  $\mu\text{m}$  size.

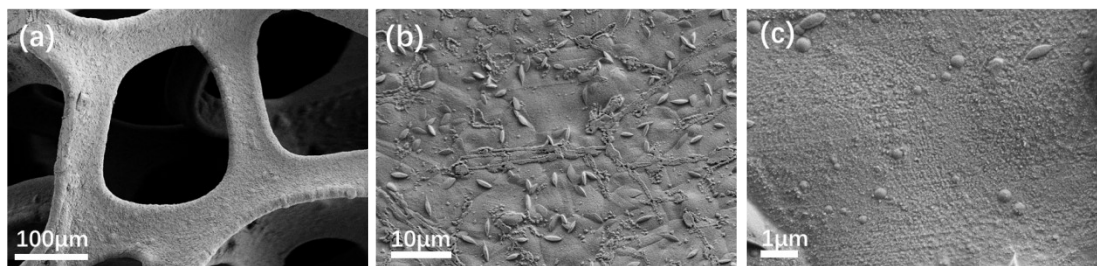

**Figure S2.** (a) SEM of  $\text{MnO}_x\text{H}_y/\text{NF}$  at 100  $\mu\text{m}$  size; (b) SEM of  $\text{MnO}_x\text{H}_y/\text{NF}$  at 10  $\mu\text{m}$  size; (c) SEM of  $\text{MnO}_x\text{H}_y/\text{NF}$  at 1  $\mu\text{m}$  size.

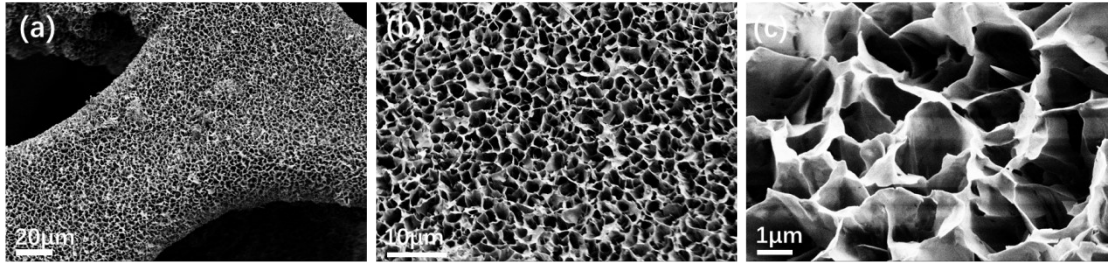

**Figure S3.** (a) SEM of CoMo precursors/NF at 20  $\mu\text{m}$  size; (b) SEM of CoMo precursors/NF at 10  $\mu\text{m}$  size; (c) SEM of CoMo precursors/NF at 1  $\mu\text{m}$  size.

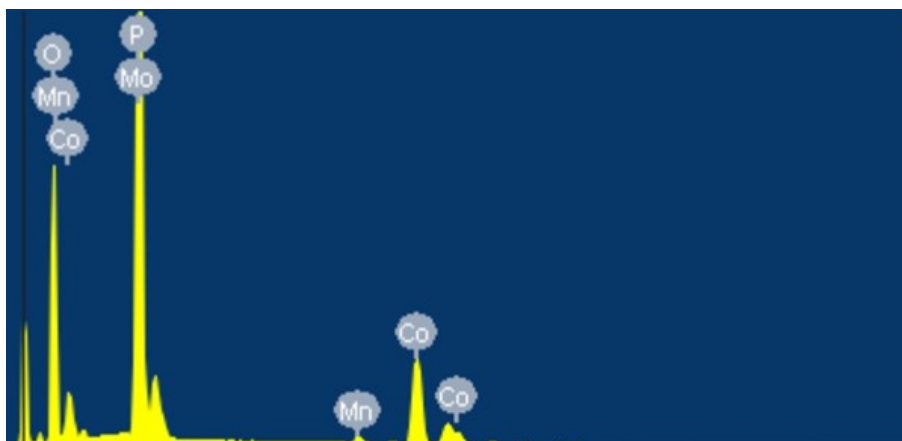

**Figure S4.** SEM-EDS spectra of  $\text{MnO}_x\text{H}_y/\text{CoMoP}/\text{NF}$ .

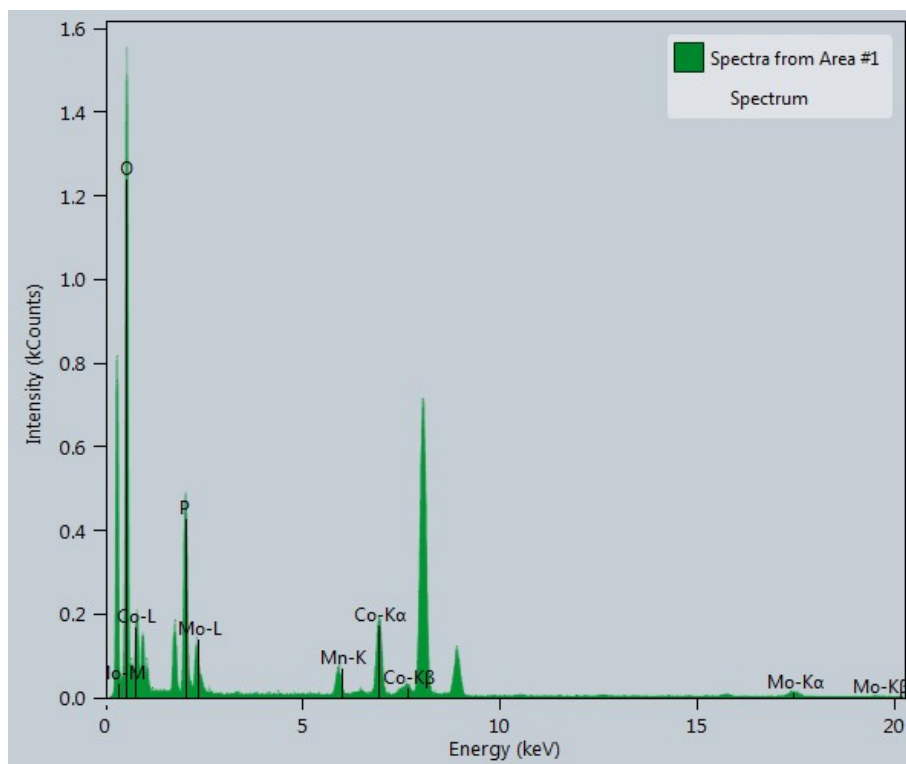

**Figure S5.** TEM-EDS spectra of MnO<sub>x</sub>H<sub>y</sub>/CoMoP/NF.



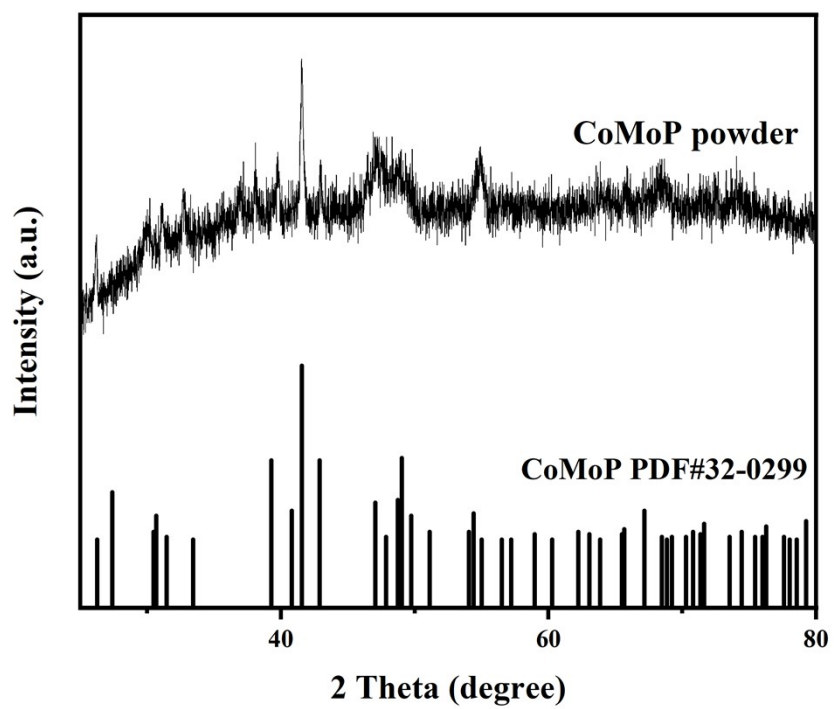

**Figure S6.** XRD of CoMoP powder.

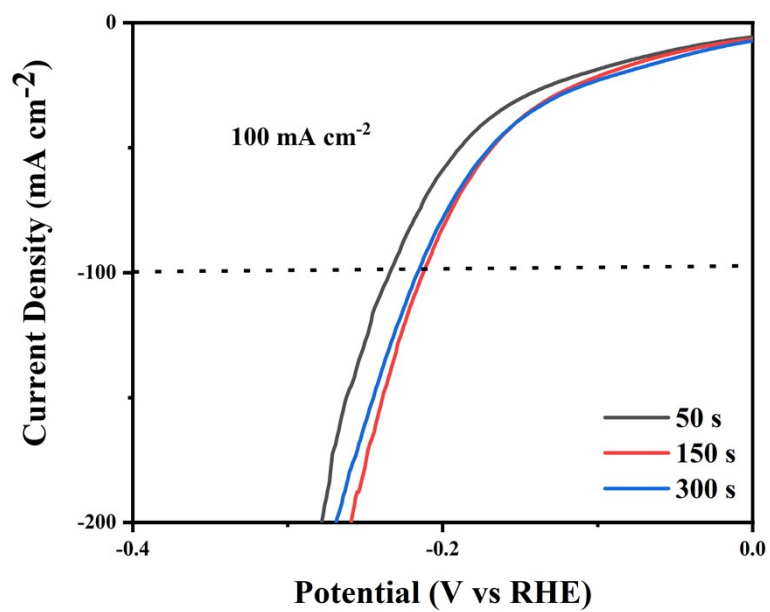

**Figure S7.** HER LSV curves of MnO<sub>x</sub>H<sub>y</sub>/CoMoP/NF with different electrodeposition times.

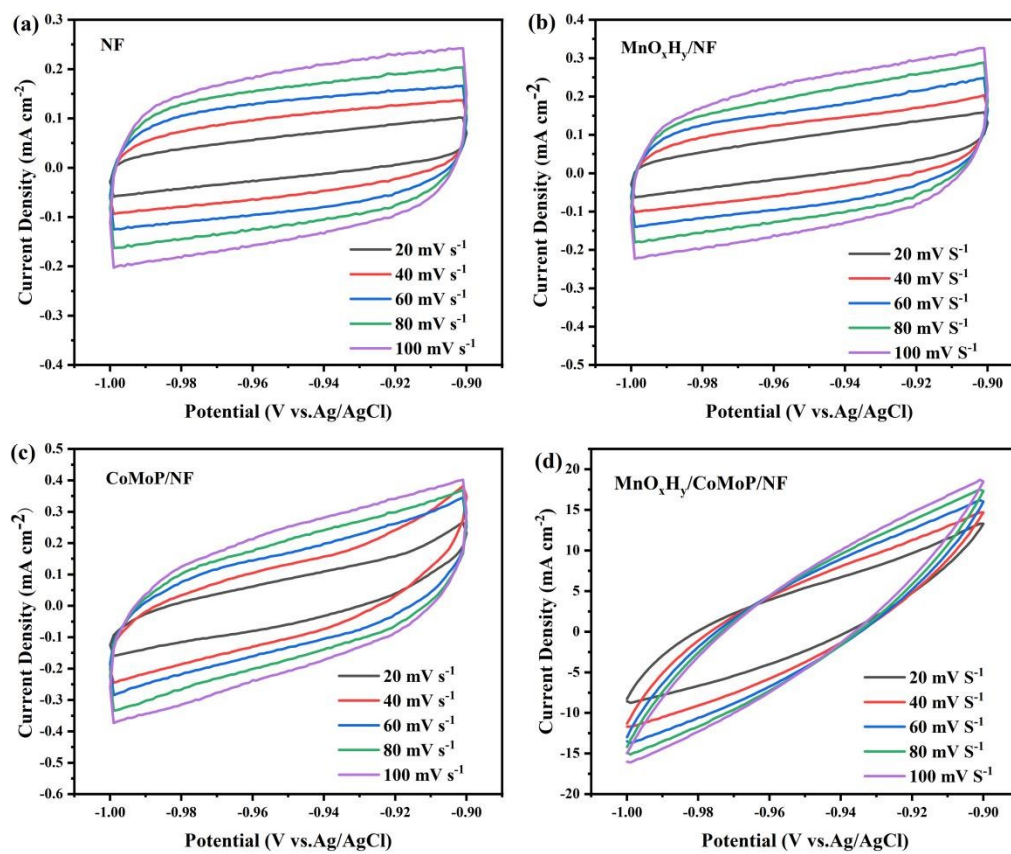

**Figure S8.** CV curves of NF,  $\text{MnO}_x\text{H}_y/\text{NF}$ , CoMoP/NF, and  $\text{MnO}_x\text{H}_y/\text{CoMoP}/\text{NF}$  in the voltage range of -1.0V to -0.9V (V vs Ag/AgCl).

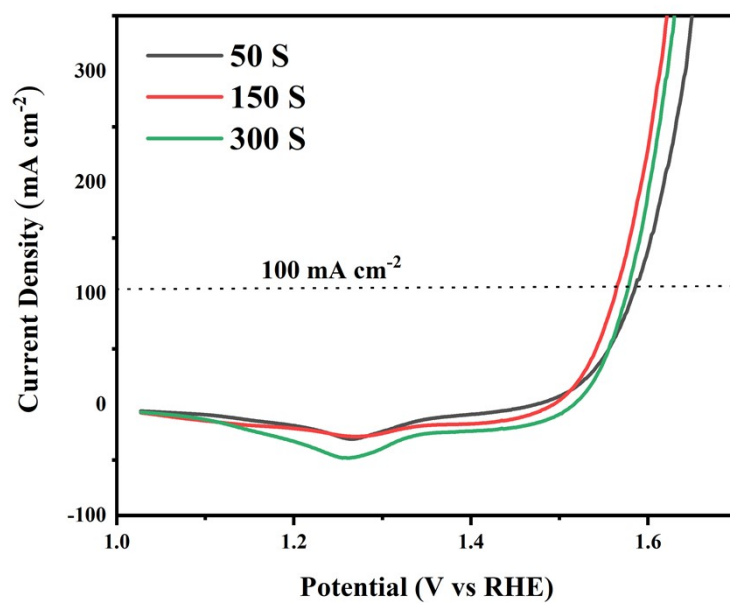

**Figure S9.** OER LSV curves of MnO<sub>x</sub>H<sub>y</sub>/CoMoP/NF with different electrodeposition times.

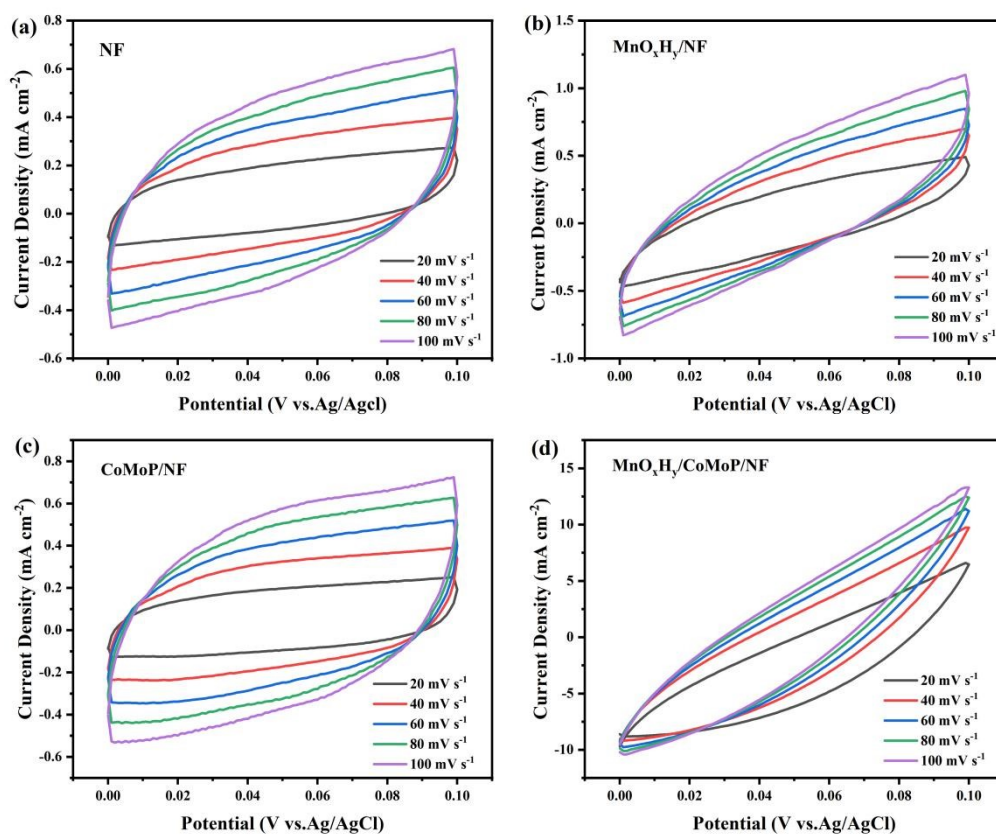

**Figure S10.** CV curves of NF,  $\text{MnO}_x\text{H}_y/\text{NF}$ ,  $\text{CoMoP}/\text{NF}$ , and  $\text{MnO}_x\text{H}_y/\text{CoMoP}/\text{NF}$  in the voltage range of 0-0.1V (V vs Ag/AgCl).

## TOF calculation

The turnover frequency ( $S^{-1}$ ) can be estimated according to this equation<sup>2</sup>:

$$\text{TOF (S}^{-1}\text{)} = I/2nF \text{ (HER); TOF (S}^{-1}\text{)} = I/4nF \text{ (OER)}$$

where  $I$  represents the current density for different samples during the LSV measurement in 1 M KOH,  $F$  is the Faraday constant (C/mol), and  $n$  is the number of the active sites (mol) for different samples. The number of active sites ( $n$ ) was

measured from CV curves within the potential range of -0.2 to 0.6 V (vs. RHE) at a scan rate of 50 mV/s in 1.0 M PBS (pH=7).

$n$  (mol) could be determined with the following equation:

$$n \text{ (mol)} = Q/2F \text{ (HER); } n \text{ (mol)} = Q/4F \text{ (OER)}$$

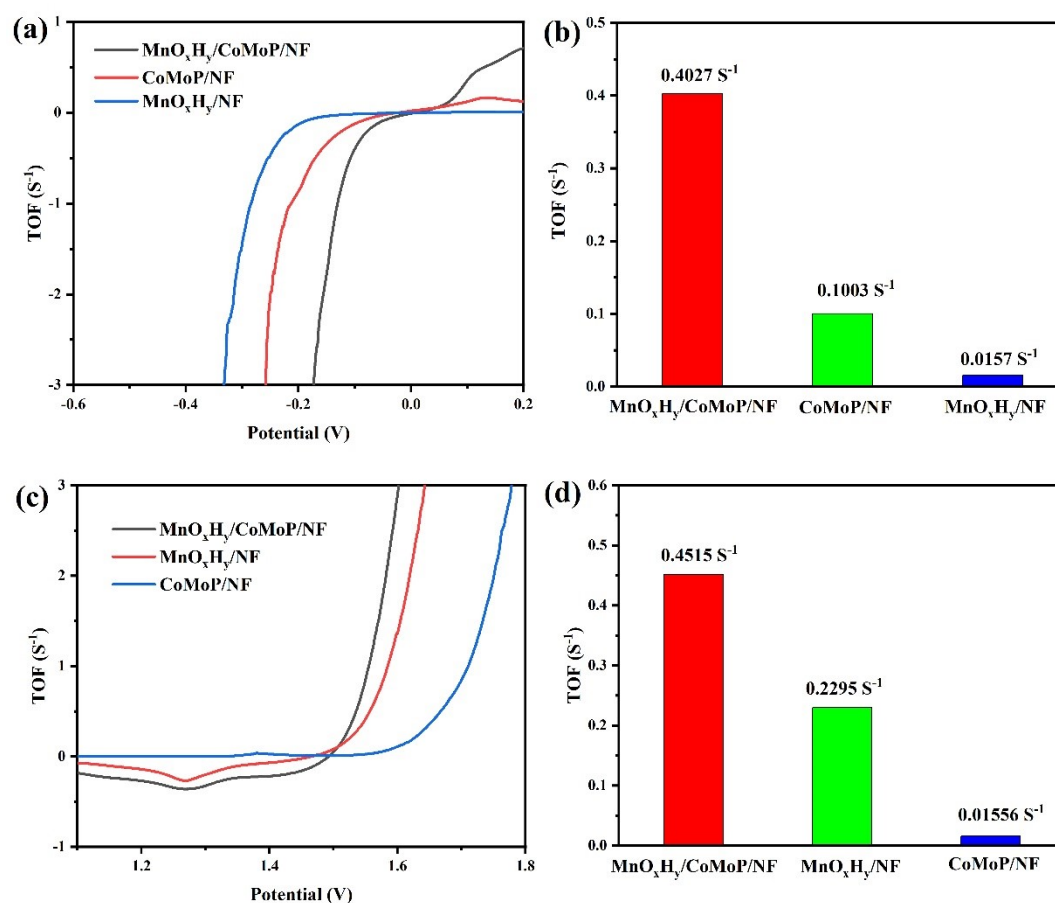

**Figure S11.** (a) Calculated TOFs for the as-synthesized catalysts in 1 M KOH (for HER); (b) TOF values of the as-synthesized catalysts at the overpotential of 100 mV (for HER); (c) Calculated TOFs for the as-synthesized catalysts in 1 M KOH (for OER); (d) TOF values of the as-synthesized catalysts at the overpotential of 300 mV (for OER).

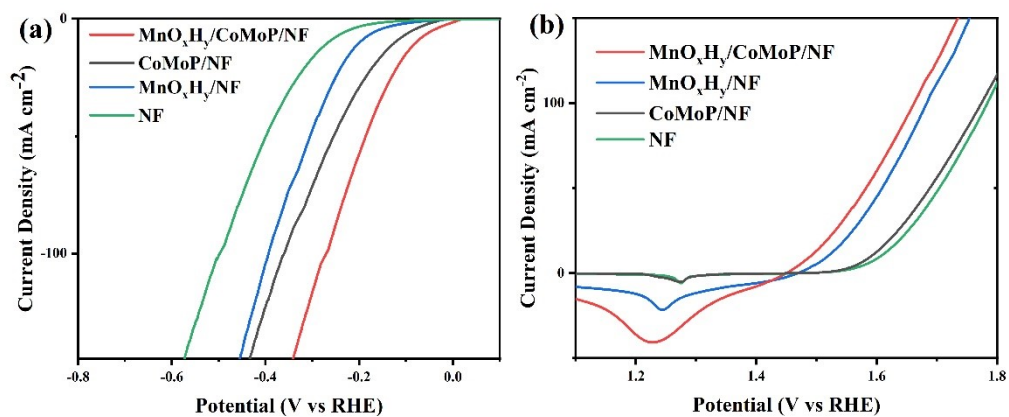

**Figure S12.** (a) Electrocatalytic HER LSV (without IR-correction, Speed of 5 mV s<sup>-1</sup>) performance of MnO<sub>x</sub>H<sub>y</sub>/CoMoP/NF, CoMoP/NF, MnO<sub>x</sub>H<sub>y</sub>/NF and bare NF in 1 M KOH; (b) Electrocatalytic OER LSV (without IR-correction, Speed of 5 mV s<sup>-1</sup>) performance of MnO<sub>x</sub>H<sub>y</sub>/CoMoP/NF, CoMoP/NF, MnO<sub>x</sub>H<sub>y</sub>/NF and bare NF in 1 M KOH.

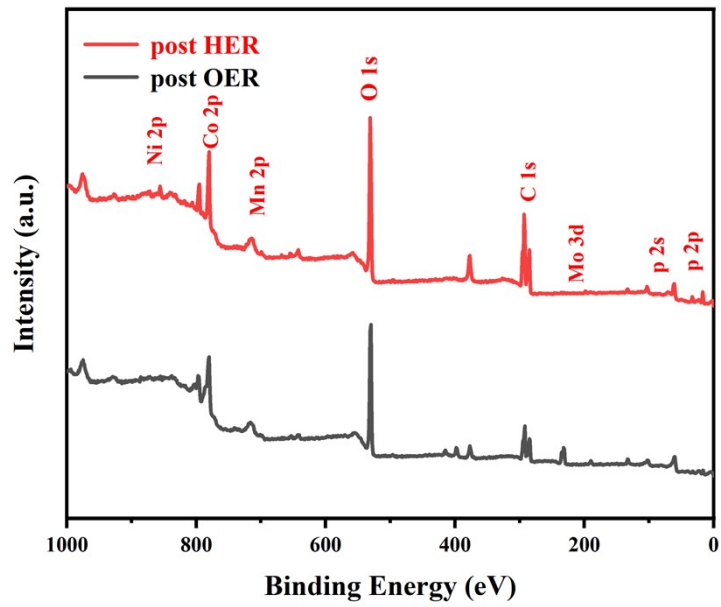

**Figure S13.** XPS of  $\text{MnO}_x\text{H}_y/\text{CoMoP}/\text{NF}$  as HER cathode and OER anode after 24 h stability treatment.



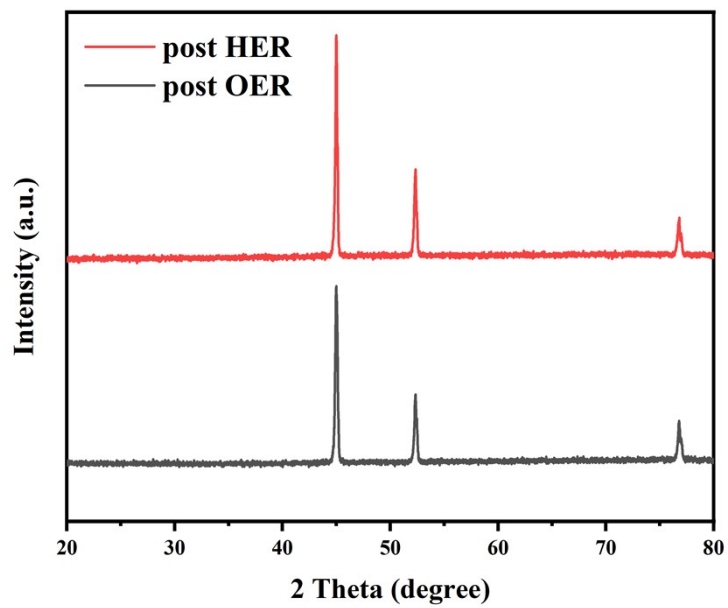

**Figure S14.** XRD of  $\text{MnO}_x\text{H}_y/\text{CoMoP}/\text{NF}$  as HER cathode and OER anode after 24 h stability treatment.

**Table S1.** The mass of of the as-synthesized catalysts.

| Samples                                  | area                         | mass    | $\Delta m$ |
|------------------------------------------|------------------------------|---------|------------|
| NF                                       | $1 \times 1 \text{ cm}^{-2}$ | 63.4 mg | —          |
| CoMoP/NF                                 | $1 \times 1 \text{ cm}^{-2}$ | 87.6 mg | 24.2 mg    |
| $\text{MnO}_x\text{H}_y/\text{CoMoP/NF}$ | $1 \times 1 \text{ cm}^{-2}$ | 94.5 mg | 6.9 mg     |

**Table S2.** EIS equivalent circuit fitting results of catalysts under HER condition.

| <b>Cathodes</b>                              | <b><math>R_{ct}</math> (<math>\Omega</math>)</b> |
|----------------------------------------------|--------------------------------------------------|
| <b>MnO<sub>x</sub>H<sub>y</sub>/CoMoP/NF</b> | 3.56                                             |
| <b>CoMoP/NF</b>                              | 8.86                                             |
| <b>MnO<sub>x</sub>H<sub>y</sub>/NF</b>       | 9.88                                             |

**Table S3.** EIS equivalent circuit fitting results of catalysts under OER condition.

| <b>Cathodes</b>                              | <b>R<sub>ct</sub> (Ω)</b> |
|----------------------------------------------|---------------------------|
| <b>MnO<sub>x</sub>H<sub>y</sub>/CoMoP/NF</b> | 0.89                      |
| <b>MnO<sub>x</sub>H<sub>y</sub>/NF</b>       | 2.67                      |
| <b>CoMoP/NF</b>                              | 3.68                      |

**Table S4.** HER activity comparison of different catalysts in alkaline condition.

| <b>Catalyst</b>                                 | <b>Electrolyte</b> | <b>Current density</b> | <b>Overpotential</b> | <b>Reference</b> |
|-------------------------------------------------|--------------------|------------------------|----------------------|------------------|
| MnO <sub>x</sub> H <sub>y</sub> /CoMoP/NF       | 1M KOH             | 10 mA/cm <sup>2</sup>  | 61 mV                | This work        |
| MnO <sub>x</sub> H <sub>y</sub> /CoMoP/NF       | 1M KOH             | 100 mA/cm <sup>2</sup> | 138 mV               | This work        |
| Ce-CoMoP/MoP/C                                  | 1M KOH             | 10 mA/cm <sup>2</sup>  | 188 mV               | 1                |
| One-Dimensional CoMoP Nanostructures            | 1M KOH             | 10 mA/cm <sup>2</sup>  | 126 mV               | 2                |
| Mn-CoP/Co <sub>2</sub> P                        | 1M KOH             | 10 mA/cm <sup>2</sup>  | 82 mV                | 3                |
| Mn doped Ni <sub>2</sub> P                      | 1M KOH             | 100 mA/cm <sup>2</sup> | 205 mV               | 4                |
| Mn <sub>0.52</sub> Fe <sub>0.71</sub> Ni-MOF-74 | 1M KOH             | 100 mA/cm <sup>2</sup> | 267 mV               | 5                |
| Ni <sub>3</sub> S <sub>2</sub> /CoMoP/NF        | 1M KOH             | 10 mA/cm <sup>2</sup>  | 96.8 mV              | 6                |
| CoP/CoMoP/NF                                    | 1M KOH             | 100 mA/cm <sup>2</sup> | 250 mV               | 7                |
| Ni <sub>2</sub> P-MoP                           | 1M KOH             | 100 mA/cm <sup>2</sup> | 161 mV               | 8                |

**Table S5.** OER activity comparison of different catalysts in alkaline condition.

| <b>Catalyst</b>                                 | <b>Electrolyte</b> | <b>Current density</b> | <b>Overpotential</b> | <b>Reference</b> |
|-------------------------------------------------|--------------------|------------------------|----------------------|------------------|
| MnO <sub>x</sub> H <sub>y</sub> /CoMoP/NF       | 1M KOH             | 100 mA/cm <sup>2</sup> | 330 mV               | This work        |
| One-Dimensional CoMoP Nanostructures            | 1M KOH             | 10 mA/cm <sup>2</sup>  | 391 mV               | 2                |
| FeMnZn/Mn-FeS                                   | 1M KOH             | 100 mA/cm <sup>2</sup> | 390 mV               | 9                |
| Mn <sub>0.52</sub> Fe <sub>0.71</sub> Ni-MOF-74 | 1M KOH             | 100 mA/cm <sup>2</sup> | 462 mV               | 5                |
| Ni <sub>3</sub> S <sub>2</sub> /CoMoP/NF        | 1M KOH             | 50mA/cm <sup>2</sup>   | 270 mV               | 6                |
| CoP/MoP@C,N                                     | 1M KOH             | 100mA/cm <sup>2</sup>  | 390 mV               | 10               |
| CoMoP@N-doped CQDs                              | 1M KOH             | 100 mA/cm <sup>2</sup> | 370 mV               | 11               |
| CoMoP@N,P,C                                     | 1M KOH             | 10 mA/cm <sup>2</sup>  | 296 mV               | 12               |
| Ni <sub>2</sub> P-MoP                           | 1M KOH             | 10 mA/cm <sup>2</sup>  | 319 mV               | 8                |

## Reference

1. T. Chen, Y. Fu, W. Liao, Y. Zhang, M. Qian, H. Dai, X. Tong and Q. Yang, *Energy Fuels*, 2021, **35**, 14169-14176.
2. X. Chang, J. Yan, X. Ding, Y. Jia, S. Li and M. Zhang, *Nanomaterials (Basel)*, 2022, **12**, 3886.
3. F. Tang, Y. W. Zhao, Y. Ge, Y. G. Sun, Y. Zhang, X. L. Yang, A. M. Cao, J. H. Qiu and X. J. Lin, *J Colloid Interface Sci*, 2022, **628**, 524-533.
4. P. Xu, L. Qiu, L. Wei, Y. Liu, D. Yuan, Y. Wang and P. Tsiakaras, *Catal. Today*, 2020, **355**, 815-821.
5. W. Zhou, Z. Xue, Q. Liu, Y. Li, J. Hu and G. Li, *ChemSusChem*, 2020, **13**, 5647-5653.
6. M. B. Poudel, N. Logeshwaran, A. R. Kim, K. S.C, S. Vijayapradeep and D. J. Yoo, *J Alloy Compd*, 2023, **960**, 170678-170689.
7. D. Ma, Z. He, T. Wei, L. Wang, Y. Li, K. V. Yurievich, R. Anton, T. Bian and S. Yan, *Int. J. Hydrogen Energy*, 2023.
8. W. Zhang, H. Yan, Y. Liu, D. Wang, Y. Jiao, A. Wu, X. Wang, R. Wang and C. Tian, *J. Mater. Chem. A*, 2023, **11**, 15033-15043.
9. L. Huang, R. Yao, Z. Li, J. He, Y. Li, H. Zong, S. Han, J. Lian, Y.-G. Li and X. Ding, *Green Chem*, 2023, **25**, 4326-4335.
10. D. Sun, S. Lin, Y. Yu, S. Liu, F. Meng, G. Du and B. Xu, *J Alloy Compd*, 2022, **895**, 162595-162604.
11. J. Han, J. Wu, S. Guan, R. Xu, J. Zhang, J. Wang, T. Guan, Z. Liu and K. Li, *Electrochim. Acta*, 2023, **438**, 141595-141604.
12. L. Yu, Y. Xiao, C. Luan, J. Yang, H. Qiao, Y. Wang, X. Zhang, X. Dai, Y. Yang and H. Zhao, *ACS Appl. Mater. Interfaces*, 2019, **11**, 6890-6899.
